# Supplementary material for: A water-stable lanthanide-functionalized MOF as a highly selective and sensitive fluorescent probe for Cd2+
Source: Royal Society of Chemistry journal article supplement (doi:10.1039/c5cc01430a), 2015-01-01
Supplement: c5cc01430a1.pdf [file c5cc01430a1.pdf]

## Supporting information

# A water-stable lanthanide-functionalized MOF as a highly selective and sensitive fluorescent probe for Cd<sup>2+</sup>

Ji-Na Hao and Bing Yan\*

Department of Chemistry, Tongji University, Siping Road 1239, Shanghai 200092, China

### Experimental section

**Chemicals.** Europium chlorides were prepared by dissolving the corresponding oxides in excess hydrochloric acid (37%) followed by evaporation and crystallization. All other starting materials were commercially available reagents of analytical grade and were used without further purification.

### Synthetic procedures

**Synthesis of Uio-66(Zr)-(COOH)<sub>2</sub> (1).** The Uio-66(Zr)-(COOH)<sub>2</sub> solid was synthesized according to the previously described procedure.<sup>1</sup> In a round bottom flask equipped with reflux condenser and magnetic stirrer, 0.43 g (0.0017 mol) of 1,2,4,5-benzenetetracarboxylic acid (H<sub>4</sub>btec) (Adamas, 98%) and 0.23 g (0.001 mol) of Zirconium tetrachloride (ZrCl<sub>4</sub>) (Ourchem, 98%) were dispersed in 5 mL of distilled water at room temperature under stirring and then heated at 100 °C for 24 h. It resulted in a white gel, which was filtered off and washed with distilled water three times. To remove the remaining free acid encapsulated within the pores as much as possible, the activation was further carried out by dispersing the sample in the distilled water (~ 10 mL per 1 g of product) and heated at 100 °C for 16 h. The solid was then recovered by filtration, washed with acetone and dried at 30 °C under vacuum, yielding ~ 0.4 g of white powder.

**Eu<sup>3+</sup>@1 preparation.** Eu<sup>3+</sup>@1 was prepared by stirring the mixture of 0.1 g of compound **1** and 0.0366 g EuCl<sub>3</sub>·6H<sub>2</sub>O in 10 mL distilled water at 60 °C for 24 h. The

solid was then filtered off, extensively washed with distilled water and dried under vacuum at 60 °C overnight.

**Luminescent sensing experiments.** For the experiments of sensing metal ions, each sample of Eu<sup>3+</sup>@1 (3 mg) was introduced into aqueous solutions (3 mL, 10<sup>-2</sup> M) of M(NO<sub>3</sub>)<sub>z</sub> (M<sup>z+</sup> = Na<sup>+</sup>, K<sup>+</sup>, Mg<sup>2+</sup>, Ca<sup>2+</sup>, Al<sup>3+</sup>, Cr<sup>3+</sup>, Mn<sup>2+</sup>, Fe<sup>2+</sup>, Co<sup>2+</sup>, Ni<sup>2+</sup>, Cu<sup>2+</sup>, Ag<sup>+</sup>, Zn<sup>2+</sup>, Cd<sup>2+</sup>, Hg<sup>2+</sup>, Pb<sup>2+</sup>).<sup>2</sup> The mixtures were then sonicated for 30 min to form the metal ion-incorporated suspensions for luminescent measurements.

### **Characterization**

The crystalline phases of the products were determined by X-ray powder diffraction patterns (XRD) using a Rigaku D/max-Rb diffractometer equipped with Cu anode. Fourier transform infrared spectra (FTIR) were recorded with a Nexus 912 AO446 infrared spectrum radiometer within the wavenumber range 4000 – 400 cm<sup>-1</sup> using the KBr pressed technique. Thermogravimetric analysis (TGA) data was obtained on a Netzsch STA 449C system with a heating rate of 5 K min<sup>-1</sup> in air. Nitrogen adsorption/desorption isotherms were performed at liquid nitrogen temperature using a Nova 1000 analyzer. Each sample was activated under vacuum overnight at 70 °C prior to measurement. ICP-MS data were obtained on an X-7 series inductively coupled plasma-mass spectrometer (Thermo Elemental, Cheshire, UK). Photoluminescent spectra and luminescence lifetimes ( $\tau$ ) were examined by a Edinburgh FLS920 spectrophotometer. The outer absolute luminescent quantum efficiency was determined using an integrating sphere (150 mm diameter, BaSO<sub>4</sub> coating) from an Edinburgh FLS920 phosphorimeter. The quantum yield can be defined as the integrated intensity of the luminescence signal divided by the integrated intensity of the absorption signal. The absorption intensity was calculated by subtracting the integrated intensity of the light source with the sample in the integrating sphere from the integrated intensity of the light source with a blank sample in the integrating sphere.

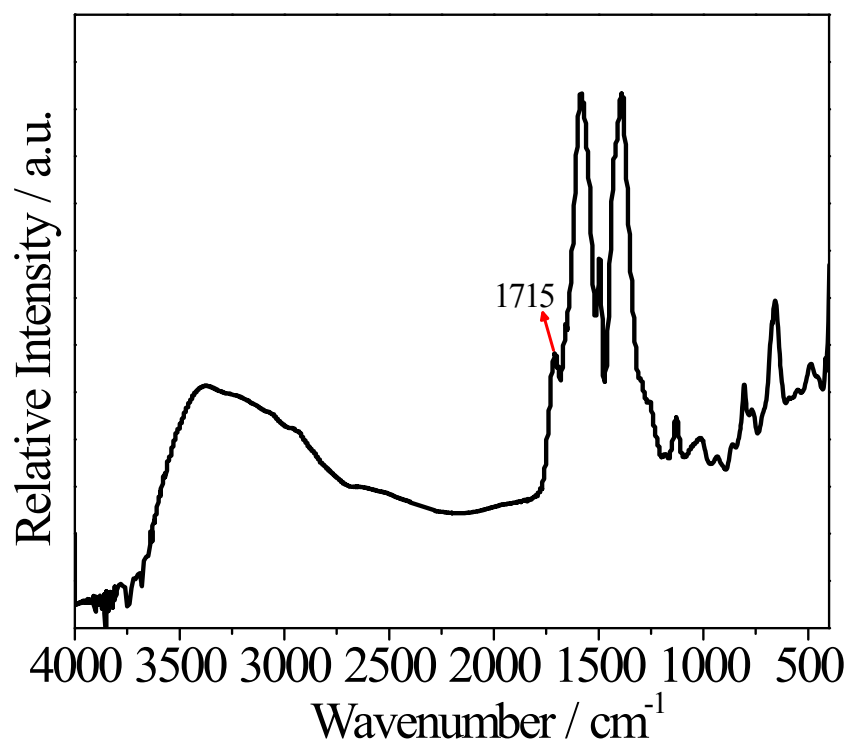

**Figure S1** FT-IR spectrum of compound **1**.

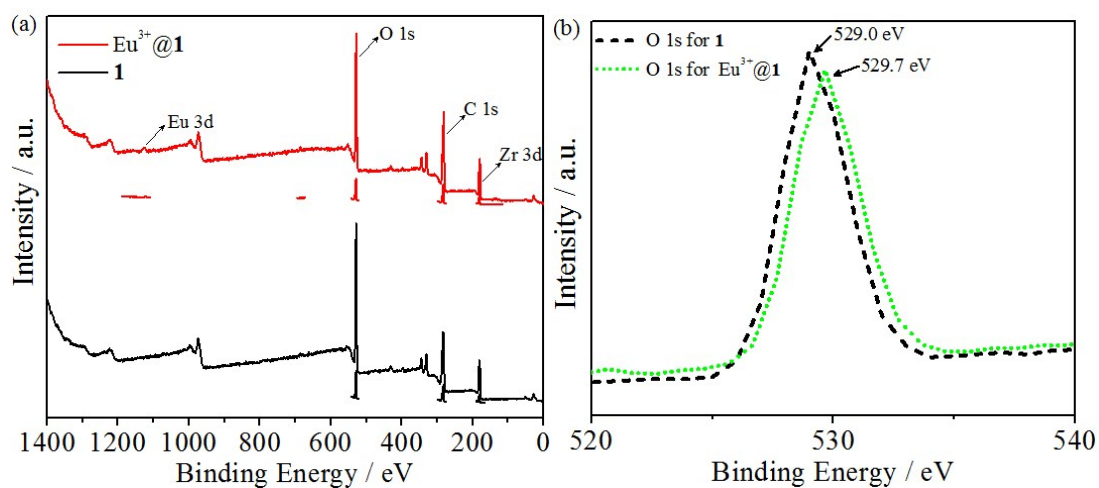

**Figure S2** XPS spectra (a) and O 1s XPS (b) for **1** and  $\text{Eu}^{3+}@1$ .

**Table S1** The ICP-MS results of  $\text{Eu}^{3+}@1$  and  $\text{Cd}^{2+}\text{-Eu}^{3+}@1$ .

| Materials                         | Zr <sup>4+</sup><br>(ppm) | Eu <sup>3+</sup><br>(ppm) | Cd <sup>2+</sup><br>(ppm) | Zr <sup>4+</sup><br>(mM) | Eu <sup>3+</sup><br>(mM) | Cd <sup>2+</sup><br>(mM) | Zr : Eu<br>: Cd |
|-----------------------------------|---------------------------|---------------------------|---------------------------|--------------------------|--------------------------|--------------------------|-----------------|
| $\text{Eu}^{3+}@1$                | 16.97                     | 12.43                     | --                        | 0.186                    | 0.082                    | --                       | 2.3:1           |
| $\text{Cd}^{2+}\text{-Eu}^{3+}@1$ | 16.46                     | 11.90                     | 2.50                      | 0.180                    | 0.078                    | 0.022                    | 8.2:<br>3.5:1   |

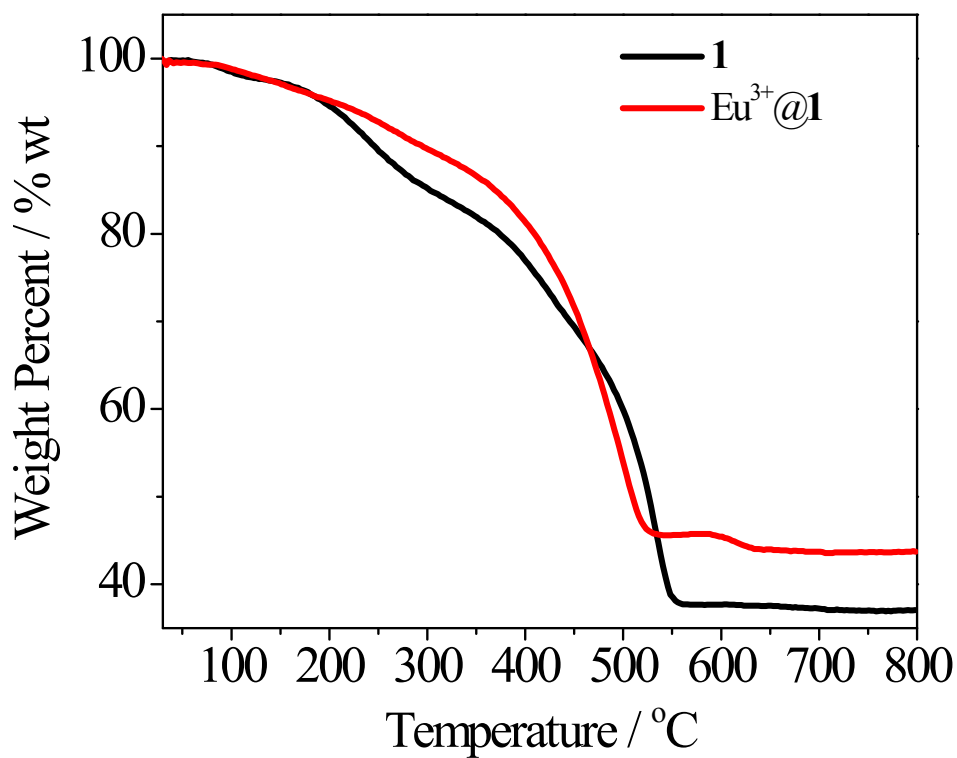

Figure S3 Thermogravimetric analysis of **1** and  $\text{Eu}^{3+}@1$ .

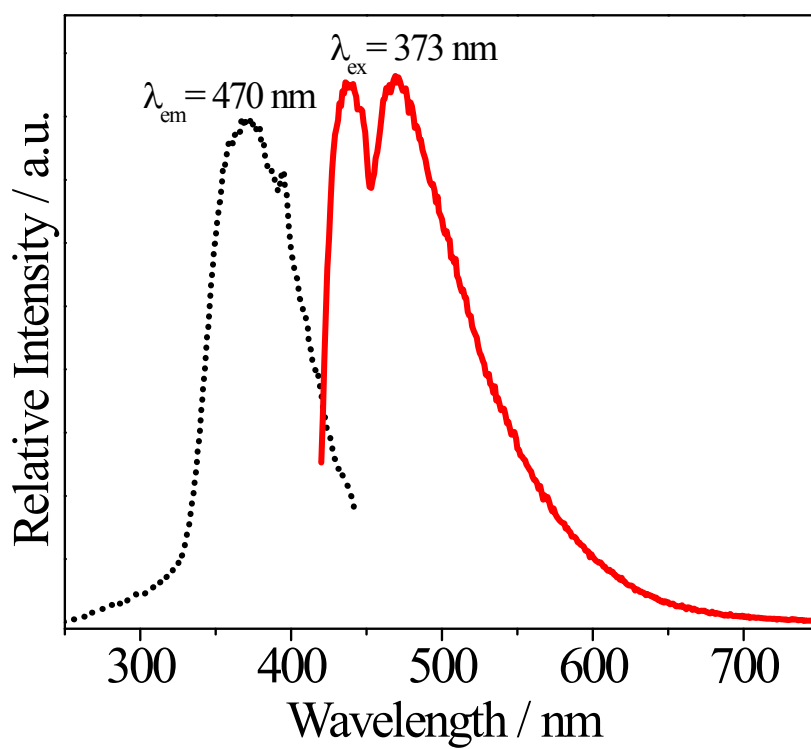

Figure S4 Excitation and emission spectra of **1**

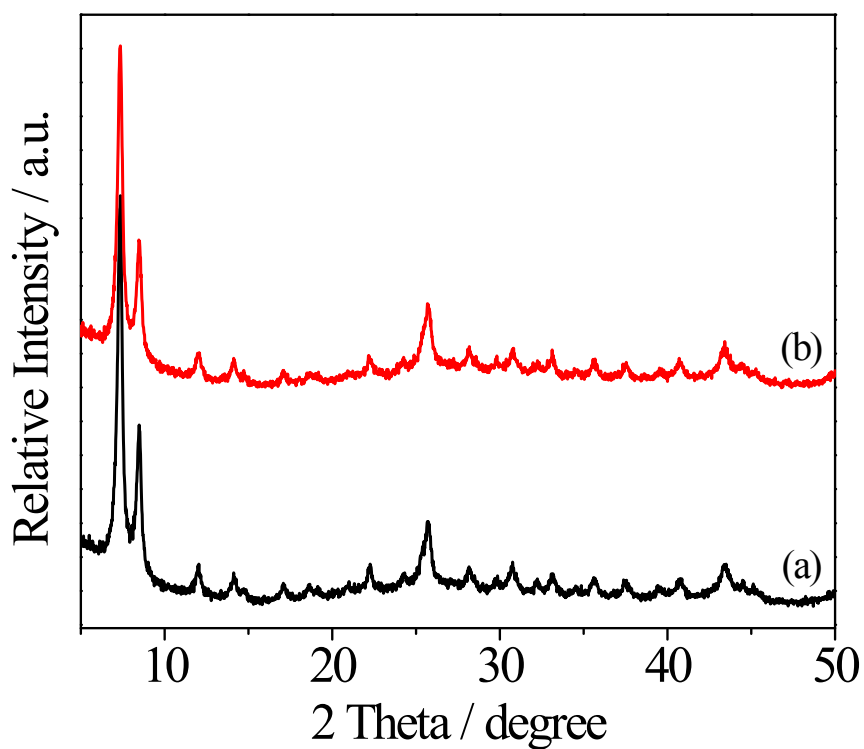

**Figure S5** PXRD patterns of  $\text{Eu}^{3+}@1$ : (a) as-synthesized; (b) after treatment in  $\text{H}_2\text{O}$  at 373 K for 24 h.

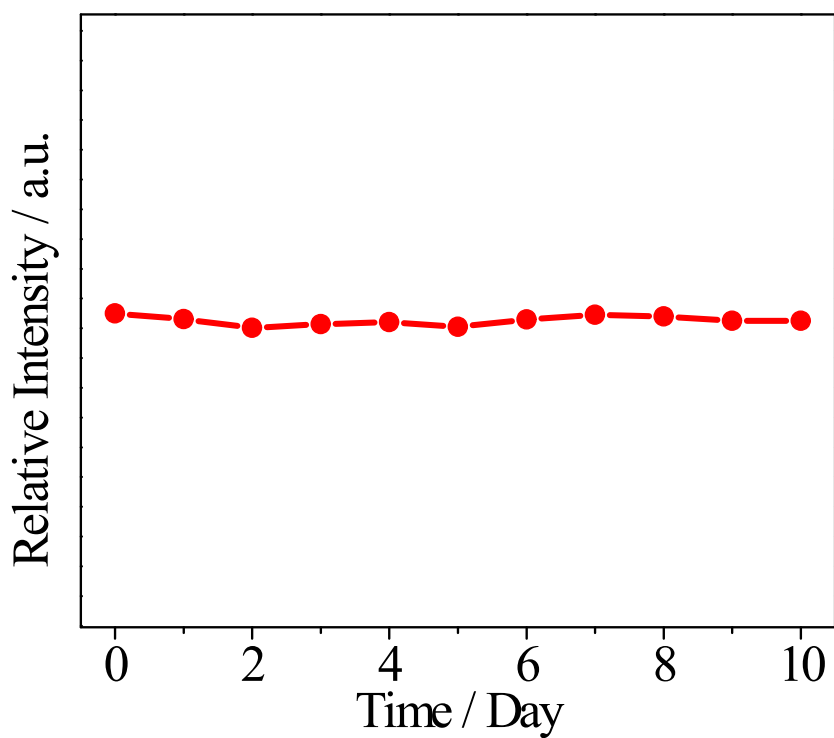

**Figure S6** Stability of fluorescent intensity (at 614 nm) of  $\text{Eu}^{3+}@1$  in  $\text{H}_2\text{O}$ .

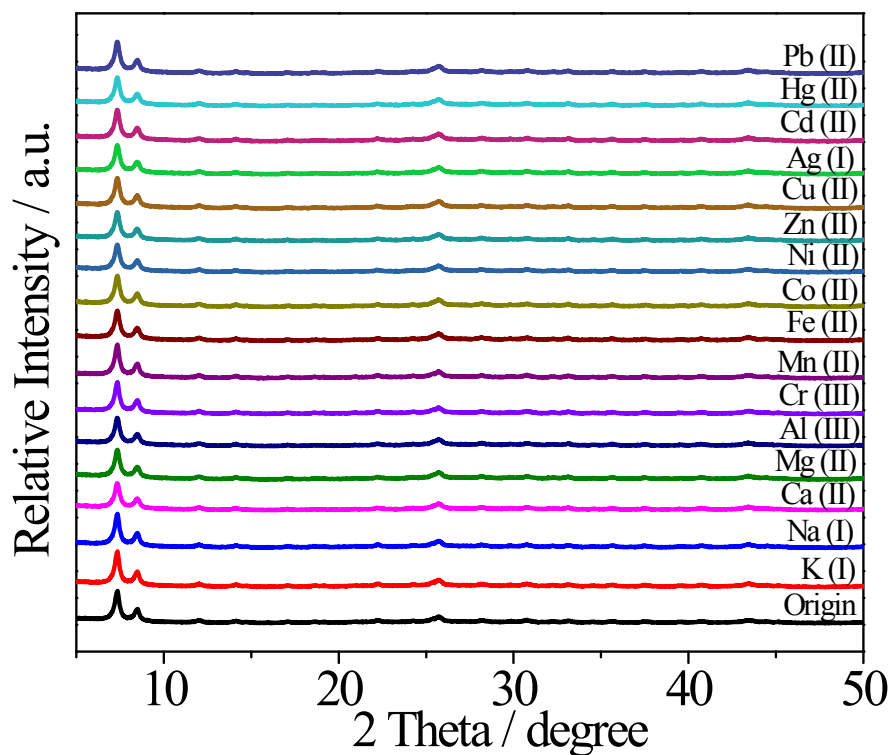

**Figure S7** PXRD patterns of the  $\text{Eu}^{3+}@1$  treated by various metal ions aqueous solutions.

**Table S2** Responses of luminescence lifetimes of  $\text{Eu}^{3+}@1$  towards various metal cations in aqueous solution.

| Metal ions           | $\tau$ ( $\mu\text{s}$ ) |
|----------------------|--------------------------|
| $\text{Cd}^{2+}$     | 763                      |
| $\text{Ca}^{2+}$     | 195                      |
| $\text{Al}^{3+}$     | 198                      |
| $\text{Mg}^{2+}$     | 187                      |
| $\text{Hg}^{2+}$     | 185                      |
| $\text{Zn}^{2+}$     | 190                      |
| $\text{K}^+$         | 189                      |
| $\text{Na}^+$        | 191                      |
| $\text{H}_2\text{O}$ | 181                      |
| $\text{Ag}^+$        | 179                      |
| $\text{Pb}^{2+}$     | 174                      |
| $\text{Ni}^{2+}$     | 169                      |
| $\text{Mn}^{2+}$     | 161                      |
| $\text{Co}^{2+}$     | 149                      |
| $\text{Cr}^{3+}$     | 117                      |
| $\text{Fe}^{2+}$     | 101                      |
| $\text{Cu}^{2+}$     | 74                       |

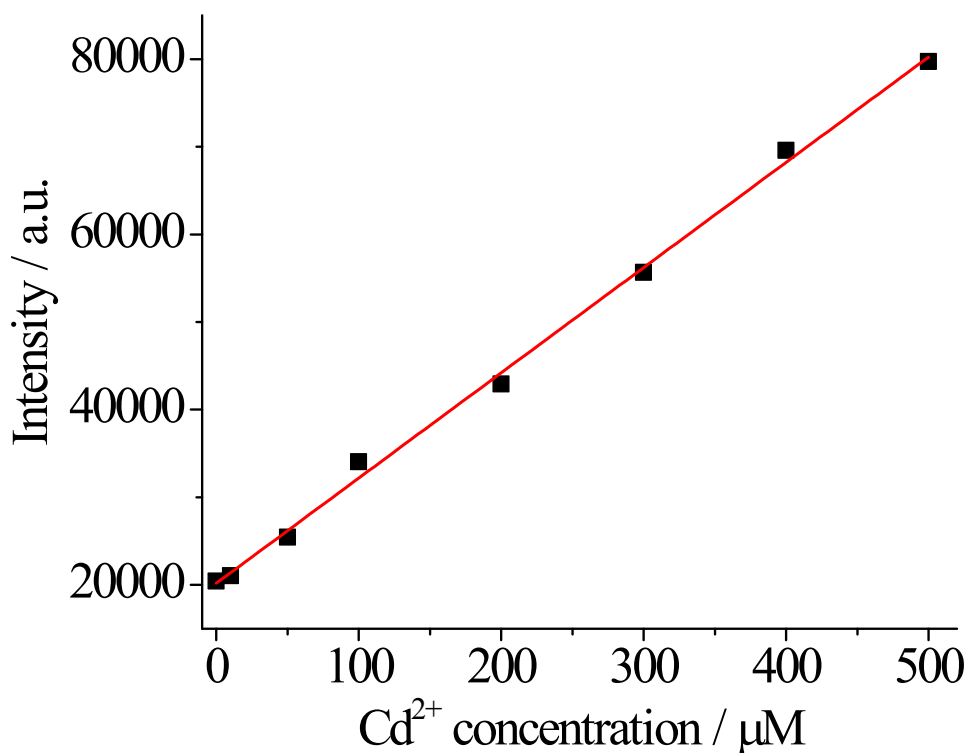

**Figure S8** The fitting curve of the emission intensity (614 nm) of Eu<sup>3+</sup>@**1** vs. Cd<sup>2+</sup> concentration.

Linear Equation:  $Y = 120 X + 20188$

$R = 0.99885$

$$S = 1.2 \times 10^8 \text{ M}^{-1}; \quad S_b = \sqrt{\frac{\sum (F_0 - F_1)^2}{N - 1}} = 2.353 \text{ (N = 20)}$$

$$\text{LOD} = 3S_b/S = 0.06 \text{ } \mu\text{M}.$$

S is the slope of the calibration curve;  $S_b$  is the standard deviation for replicating detections of blank solutions;  $F_0$  is the fluorescence intensity of Eu<sup>3+</sup>@**1** in water;  $F_1$  is the average of the  $F_0$ .<sup>3</sup>

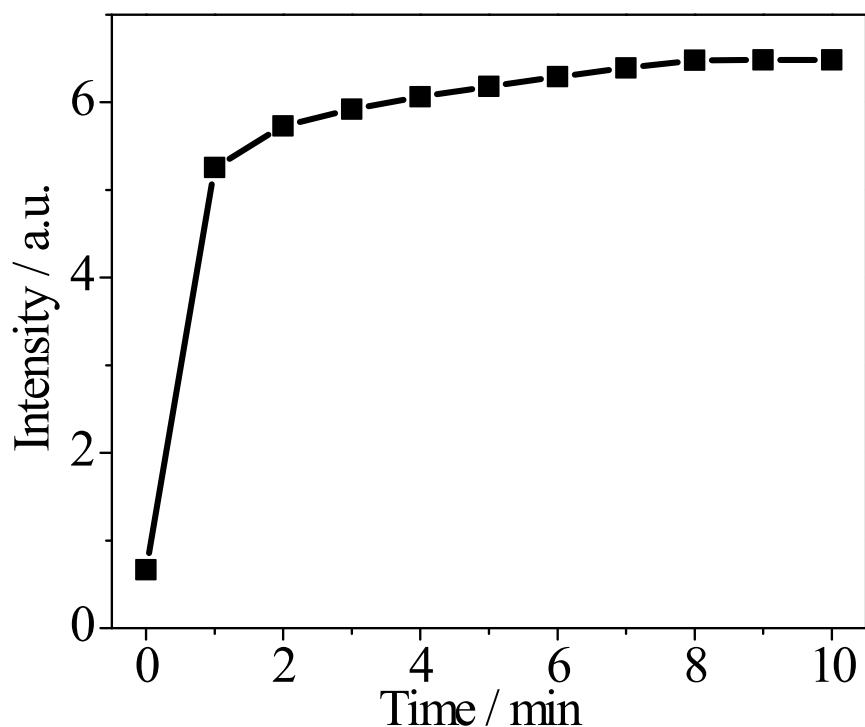

**Figure S9** Variation of luminescent intensity of Eu<sup>3+</sup>@1 at 614 nm with immersion time in Cd<sup>2+</sup> aqueous solution (10 mM),  $\lambda_{\text{ex}} = 322$  nm.

**Table S3** Determination of Cd<sup>2+</sup> in real water samples by the standard addition method.

| Sample       | Added Cd <sup>2+</sup> ( $\mu\text{M}$ ) | Detected Cd <sup>2+</sup> ( $\mu\text{M}$ )<br>by Eu <sup>3+</sup> @1 sensor | Recovery (%) |
|--------------|------------------------------------------|------------------------------------------------------------------------------|--------------|
| Tap water 1  | 0                                        | undetected                                                                   | N/A          |
| Tap water 2  | 5                                        | 4.85                                                                         | 97%          |
| Tap water 3  | 50                                       | 51.26                                                                        | 102.52%      |
| Tap water 4  | 100                                      | 99.30                                                                        | 99.3%        |
| Lake water 1 | 0                                        | undetected                                                                   | N/A          |
| Lake water 2 | 5                                        | 4.94                                                                         | 98.8%        |
| Lake water 3 | 50                                       | 48.90                                                                        | 97.8%        |
| Lake water 4 | 100                                      | 101.70                                                                       | 101.7%       |



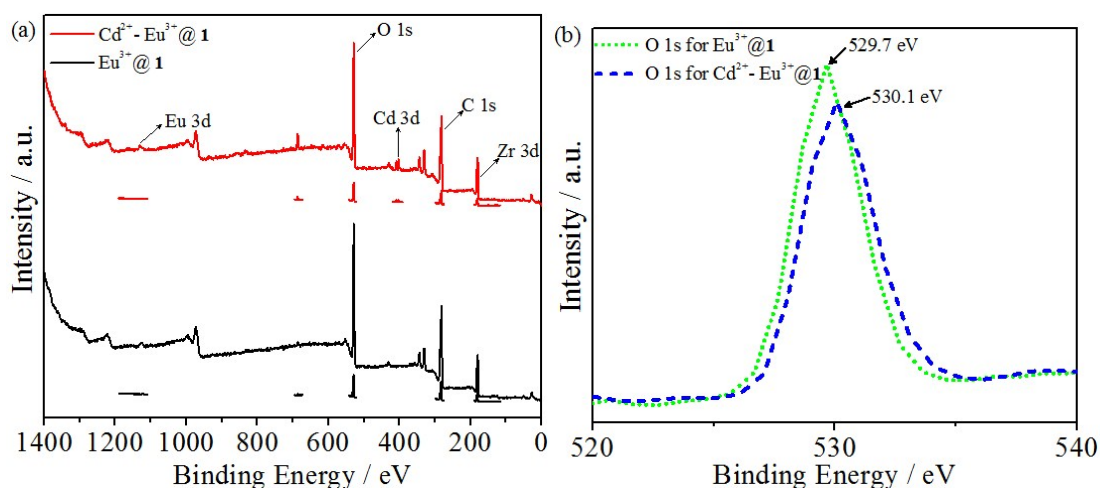

**Figure S10** XPS spectra (a) and O 1s XPS (b) for  $\text{Eu}^{3+}@1$  and  $\text{Cd}^{2+}\text{-Eu}^{3+}@1$ .

### References

- 1 Q. Y. Yang, S. Vaesen, F. Ragon, A. D. Wiersum, D. Wu, A. Lago, T. Devic, C. Martineau, F. Taulelle, P. L. Llewellyn, H. Jobic, C. L. Zhong, C. Serre, G. D. Weireld and G. Maurin, *Angew. Chem. Int. Ed.*, 2013, **52**, 10316.
- 2 a) Z. M. Hao, X. Z. Song, M. Zhu, X. Meng, S. N. Zhao, S. Q. Su, W. T. Yang, S. Y. Song and H. J. Zhang, *J. Mater. Chem. A*, 2013, 1, 11043; b) J. M. Zhou, W. Shi, H. M. Li, H. Li and P. Cheng, *J. Phys. Chem. C*, 2014, 118, 416.
- 3 G. Y. Gao, W. J. Qu, B. B. Shi, Q. Lin, H. Yao, Y. M. Zhang, J. Chang, Y. Cai and T. B. Wei, *Sensor Actuat. B-Chem.*, 2015, DOI: 10.1016/j.snb.2015.02.077
